# Supplementary material
Source: HighWire-hosted journal article supplement (doi:10.1101/rna.079555.122)
Supplement: Supplemental_Data.docx [file Supplemental_Data.docx]

**Supplementary Figure 1: Phosphomimetic mutations at She2 S101 and T47 disrupt asymmetric distribution of Ash1**. (**A**) Genetic assay to assess Ash1 asymmetric distribution in She2 S101 mutants. Serial dilutions of K5547+YCP22-She2-myc (WT), K5547+YCP22 empty (vector), K5547+YCP22-She2-S101A-myc and K5547+YCP22-She2-S101D-myc. (**B**) Western blot analysis of She2-myc WT, S101A and S101D expression in the K5547 strain. YCP: K5547+YCP22 empty. Tubulin was used as loading control. (**C**) Genetic assay to assess Ash1 asymmetric distribution in She2 T47 mutants. Serial dilutions of K5547+YCP22-She2-myc (WT), K5547+YCP22 empty (vector), K5547+YCP22-She2-T47A-myc and K5547+YCP22-She2-T47D-myc. (**D**) Western blot analysis of She2-myc WT, T47A and T47D expression in the K5547 strain. YCP: K5547+YCP22 empty. Tubulin was used as loading control.

**Supplementary Figure 2:** **Genetic assay to assess Ash1 asymmetric distribution in She2 phosphosites mutants**. Serial dilutions of K5547 strain transformed with plasmids YCP22-She2-myc (SHE2 WT), YCPlac22 empty (vector) or with either (**A**) YCP22-She2-S2A-myc or YCP22-She2-S2D-myc; (**B**) YCP22-She2-Y65F-myc, YCP22-She2-Y148F-myc or YCP22-She2-Y65F Y148F-myc; (**C**) YCP22-She2-S91A-myc or YCP22-She2-S91D-myc; (**D**) YCP22-She2-S101A-myc, YCP22-She2-T109A-myc or YCP22-She2-S101A T109A-myc; (**E**) YCP22-She2-S217D-myc, YCP22-She2-S224A-myc, YCP22-She2-S224D-myc, YCP22-She2-S217A S224A-myc or YCP22-She2-S217D S224D-myc; **(F)** YCP22-She2-S166D-myc. Serial dilutions of yeast cultures were plated on either -TRP or -TRP -ADE plates.

Table S4: Plasmids used in this study

| **Plasmid** | **Features** | **Source** |
| --- | --- | --- |
| YCPlac22 | Single copy yeast vector with *TRP1* selectable marker | Gietz, 1988 |
| YCP22-SHE2-MYC | Expresses SHE2-6xMYC from endogenous promoter | Long et al., 2000 |
| YCP22-SHE2-MYC S2A | Expresses SHE2-S2A-MYC from endogenous promoter | This study |
| YCP22-SHE2-MYC S2D | Expresses SHE2-S2D-MYC from endogenous promoter | This study |
| YCP22-SHE2-MYC T109A | Expresses SHE2-T109A-MYC from endogenous promoter | This study |
| YCP22-SHE2-MYC T109D | Expresses SHE2-T109D-MYC from endogenous promoter | This study |
| YCP22-SHE2-MYC S101A | Expresses SHE2-S101A-MYC from endogenous promoter | This study |
| YCP22-SHE2-MYC S101D | Expresses SHE2-S101D-MYC from endogenous promoter | This study |
| YCP22-SHE2-MYC T47A | Expresses SHE2-T47A-MYC from endogenous promoter | This study |
| YCP22-SHE2-MYC T47D | Expresses SHE2-T47D-MYC from endogenous promoter | This study |
| YCP22-SHE2-MYC S91A | Expresses SHE2-S91A-MYC from endogenous promoter | This study |
| YCP22-SHE2-MYC S91D | Expresses SHE2-S91D-MYC from endogenous promoter | This study |
| YCP22-SHE2-MYC Y65F | Expresses SHE2-Y65F-MYC from endogenous promoter | This study |
| YCP22-SHE2-MYC Y148F | Expresses SHE2-Y148F-MYC from endogenous promoter | This study |
| YCP22-SHE2-MYC Y65F Y148F | Expresses SHE2-Y65F Y148F-MYC from endogenous promoter | This study |
| YCP22-SHE2-MYC S217D | Expresses SHE2-S217D-MYC from endogenous promoter | This study |
| YCP22-SHE2-MYC S166D | Expresses SHE2-S166D-MYC from endogenous promoter | This study |
| YCP22-SHE2-MYC S224A | Expresses SHE2-S224A-MYC from endogenous promoter | This study |
| YCP22-SHE2-MYC S224D | Expresses SHE2-S224D-MYC from endogenous promoter | This study |
| YCP22-SHE2-MYC S101A T109A | Expresses SHE2-S101A T109A-MYC from endogenous promoter | This study |
| YCP22-SHE2-MYC S217A S224A | Expresses SHE2-S217A S224A-MYC from endogenous promoter | This study |
| YCP22-SHE2-MYC S217D S224D | Expresses SHE2-S217D S224D-MYC from endogenous promoter | This study |
| pGADT7 | Yeast two-hybrid vector expressing protein fused to the Gal4 activation domain | Clontech |
| pGBKT7 | Yeast two-hybrid vector expressing protein fused to the Gal4 binding domain | Clontech |
| pGADT7-She2 | plasmid for expression of She2-Gal4AD | Shen et al., 2009 |
| pGBKT7-She2 | plasmid for expression of She2-Gal4BD | This study |
| pGADT7-She2-T109A | plasmid for expression of She2-T109A-Gal4AD | This study |
| pGADT7-She2-T109D | plasmid for expression of She2-T109D-Gal4AD | This study |
| pGBKT7-Srp1 | plasmid for expression of Srp1-Gal4BD | This study |
| pGBKT7-She3-CT | plasmid for expression of She3-CT-Gal4BD | This study |
| C3319 | YEPlac181 with *ASH1* under endogenous promoter | Jansen et al., 1996 |

Table S5: Strains used in this study

| **Strain** | **Genotype** | **Source** |
| --- | --- | --- |
| K699 | *MATa ade2-1 trp1-1 can1-100 leu2-3,112 his3-11,15 ura3-1* | Jansen et al., 1996 |
| K699 *she2* | *K699 she2::KAN* | Shen et al., 2009 |
| K5547 | *Matα, his3, leu2, ade2, trp1, ura3, HO-ADE2, HO-CAN1, she2::URA3* | R-P Jansen lab |
| YS1052 | *MATa ade2-1 trp1-1 can1-100 leu2-3,112 his3-11,15 ura3 cdc28-as1* | S. Michnick lab |
| YS1052 GST-SHE2 | *MATa ade2-1 trp1-1 can1-100 leu2-3,112 his3-11,15 ura3 cdc28-as1 GAL1prom-GST-SHE2::KAN* | This study |
| pJ69-4A | *MATa trp1-901 leu2-3,112 ura3-52 his3-200 gal4Δ gal80Δ LYS2::GAL1-HIS3 GAL2-ADE2 met2::GAL7-lacZ* | S. Field lab |
| YS1116 | *pJ69-4A SHE2::KAN* | This study |
