# Supplementary material
Source: HighWire-hosted journal article supplement (doi:10.1101/rna.079555.122)
Supplement: Supplemental_Tables_S1-S3.xlsx [file Supplemental_Tables_S1-S3.xlsx]

## Sheet: Supp_Table S1
Experiment name	Biological sample category	Biological sample name	MS/MS sample name	Protein name	Protein accession numbers	Alternate IDsDatabase sources	Protein molecular weight (Da)	Protein identification probability	Exclusive unique peptide count	Exclusive unique spectrum count	Exclusive spectrum count	Percentage of total spectra	Percentage sequence coverage	Manual validation	Assigned	Spectrum name	Peptide sequence	Previous amino acid	Next amino acid	Peptide identification probability	Mascot Ion score	Mascot Identity score	Mascot Delta Ion Score	Number of enzymatic termini	Fixed modifications identified by spectrum	Variable modifications identified by spectrum	Observed m/z	Actual peptide mass (AMU)	Calculated +1H Peptide Mass (AMU)	Spectrum charge	Actual minus calculated peptide mass (AMU)	Actual minus calculated peptide mass (PPM)	Retention Time (sec)	Total Ion Current	Peptide start index	Peptide stop index	Exclusive	Other Proteins
Pascal Chartrand She-GST 051213v3	She-GST	She-GST	~~serv02-iric.iric.umontreal.ca~Groupe~Thibault~-=Proteomics_Raw_Data=-~ELITE~DEC05_2013~Service_Chartrand_051213_1.raw.-1 (F188368)	[].	She-GST	Misc_12_Dec_2013_15_07_00.fasta	55286.8	1	99	171	896	0.0818	0.766	possibly correct	true	9422: Scan 13632 (rt=60.2726) [\\serv02-iric.iric.umontreal.ca\Groupe\Thibault\-=Proteomics_Raw_Data=-\ELITE\DEC05_2013\Service_Chartrand_051213_1.raw]	EADSFDkVILPIAsMFVkcVETFDLLNYYLTQSLQK	P	E	0.997	62.3	48.1	5.18	2		k7: Acetyl (+42,01), s14: Phospho (+79,97), k18: Acetyl (+42,01), c19: Carbamidomethyl (+57,02)	1464.03	4389.07	4390.13	3	-0.05823	-13.26	3616.36	7320.14	320	355	true
Pascal Chartrand She-GST 051213v3	She-GST	She-GST	~~serv02-iric.iric.umontreal.ca~Groupe~Thibault~-=Proteomics_Raw_Data=-~ELITE~DEC05_2013~Service_Chartrand_051213_1.raw.-1 (F188368)	[].	She-GST	Misc_12_Dec_2013_15_07_00.fasta	55286.8	1	99	171	896	0.0818	0.766	possibly correct	true	9792: Scan 14035 (rt=61.5153) [\\serv02-iric.iric.umontreal.ca\Groupe\Thibault\-=Proteomics_Raw_Data=-\ELITE\DEC05_2013\Service_Chartrand_051213_1.raw]	KCVEtFDLLnYYLTQSLQK	V	E	0.964	39.2	39.2	11.4	2		t5: Phospho (+79,97), n10: Deamidation (+0,98)	796.371	2386.09	2387.12	3	-0.02576	-10.79	3690.92	28880.8	337	355	true
Pascal Chartrand She-GST 051213v3	She-GST	She-GST	~~serv02-iric.iric.umontreal.ca~Groupe~Thibault~-=Proteomics_Raw_Data=-~ELITE~DEC05_2013~Service_Chartrand_051213_1.raw.-1 (F188368)	[].	She-GST	Misc_12_Dec_2013_15_07_00.fasta	55286.8	1	99	171	896	0.0818	0.766	possibly correct	true	9608: Scan 13836 (rt=60.9129) [\\serv02-iric.iric.umontreal.ca\Groupe\Thibault\-=Proteomics_Raw_Data=-\ELITE\DEC05_2013\Service_Chartrand_051213_1.raw]	KCVEtFDLLnYYLTQSLQK	V	E	0.997	53.2	39.2	16.3	2		t5: Phospho (+79,97), n10: Deamidation (+0,98)	796.371	2386.09	2387.12	3	-0.02441	-10.22	3654.77	188796	337	355	true
Pascal Chartrand She-GST 051213v3	She-GST	She-GST	~~serv02-iric.iric.umontreal.ca~Groupe~Thibault~-=Proteomics_Raw_Data=-~ELITE~DEC05_2013~Service_Chartrand_051213_1.raw.-1 (F188368)	[].	She-GST	Misc_12_Dec_2013_15_07_00.fasta	55286.8	1	99	171	896	0.0818	0.766	possibly correct	true	9454: Scan 13667 (rt=60.3867) [\\serv02-iric.iric.umontreal.ca\Groupe\Thibault\-=Proteomics_Raw_Data=-\ELITE\DEC05_2013\Service_Chartrand_051213_1.raw]	KCVEtFDLLnYYLTQSLQK	V	E	0.997	58.5	39.1	5.63	2		t5: Phospho (+79,97), n10: Deamidation (+0,98)	796.372	2386.09	2387.12	3	-0.02375	-9.947	3623.2	709145	337	355	true
Pascal Chartrand She-GST 051213v3	She-GST	She-GST	~~serv02-iric.iric.umontreal.ca~Groupe~Thibault~-=Proteomics_Raw_Data=-~ELITE~DEC05_2013~Service_Chartrand_051213_1.raw.-1 (F188368)	[].	She-GST	Misc_12_Dec_2013_15_07_00.fasta	55286.8	1	99	171	896	0.0818	0.766	possibly correct	true	6939: Scan 10881 (rt=51.065) [\\serv02-iric.iric.umontreal.ca\Groupe\Thibault\-=Proteomics_Raw_Data=-\ELITE\DEC05_2013\Service_Chartrand_051213_1.raw]	KKLRFynDCVLSYNASEFINEGK	V	N	0.992	48.9	41.4	10.6	2		y6: Phospho (+79,97), n7: Deamidation (+0,98)	940.442	2818.3	2819.31	3	0.0005946	0.2109	3063.9	6918.73	292	314	true
Pascal Chartrand She-GST 051213v3	She-GST	She-GST	~~serv02-iric.iric.umontreal.ca~Groupe~Thibault~-=Proteomics_Raw_Data=-~ELITE~DEC05_2013~Service_Chartrand_051213_1.raw.-1 (F188368)	[].	She-GST	Misc_12_Dec_2013_15_07_00.fasta	55286.8	1	99	171	896	0.0818	0.766	correct	true	7099: Scan 11062 (rt=51.6711) [\\serv02-iric.iric.umontreal.ca\Groupe\Thibault\-=Proteomics_Raw_Data=-\ELITE\DEC05_2013\Service_Chartrand_051213_1.raw]	KKLRFynDCVLSYNASEFINEGK	V	N	0.997	54	41.5	24.1	2		y6: Phospho (+79,97), n7: Deamidation (+0,98)	940.439	2818.29	2819.31	3	-0.009485	-3.364	3100.26	10203.3	292	314	true
Pascal Chartrand She-GST 051213v3	She-GST	She-GST	~~serv02-iric.iric.umontreal.ca~Groupe~Thibault~-=Proteomics_Raw_Data=-~ELITE~DEC05_2013~Service_Chartrand_051213_1.raw.-1 (F188368)	[].	She-GST	Misc_12_Dec_2013_15_07_00.fasta	55286.8	1	99	171	896	0.0818	0.766	correct	true	5848: Scan 9651 (rt=46.9446) [\\serv02-iric.iric.umontreal.ca\Groupe\Thibault\-=Proteomics_Raw_Data=-\ELITE\DEC05_2013\Service_Chartrand_051213_1.raw]	LEVLFQGPMsKD	R	K	0.956	38.9	33.4	25.1	2		s10: Phospho (+79,97)	722.339	1442.66	1443.66	2	0.01109	7.679	2816.68	17722.2	225	236	true
Pascal Chartrand She-GST 051213v3	She-GST	She-GST	~~serv02-iric.iric.umontreal.ca~Groupe~Thibault~-=Proteomics_Raw_Data=-~ELITE~DEC05_2013~Service_Chartrand_051213_1.raw.-1 (F188368)	[].	She-GST	Misc_12_Dec_2013_15_07_00.fasta	55286.8	1	99	171	896	0.0818	0.766	correct	true	5711: Scan 9496 (rt=46.4225) [\\serv02-iric.iric.umontreal.ca\Groupe\Thibault\-=Proteomics_Raw_Data=-\ELITE\DEC05_2013\Service_Chartrand_051213_1.raw]	LEVLFQGPMsKD	R	K	0.986	45.9	33.4	36.1	2		s10: Phospho (+79,97)	722.338	1442.66	1443.66	2	0.01043	7.222	2785.35	14875.5	225	236	true

## Sheet: Supp_Table S2
Experiment name	Biological sample category	Biological sample name	MS/MS sample name	Protein name	Protein accession numbers	Alternate IDsDatabase sources	Protein molecular weight (Da)	Protein identification probability	Exclusive unique peptide count	Exclusive unique spectrum count	Exclusive spectrum count	Percentage of total spectra	Percentage sequence coverage	Manual validation	Assigned	Spectrum name	Peptide sequence	Previous amino acid	Next amino acid	Peptide identification probability	Mascot Ion score	Mascot Identity score	Mascot Delta Ion Score	Number of enzymatic termini	Fixed modifications identified by spectrum	Variable modifications identified by spectrum	Observed m/z	Actual peptide mass (AMU)	Calculated +1H Peptide Mass (AMU)	Spectrum charge	Actual minus calculated peptide mass (AMU)	Actual minus calculated peptide mass (PPM)	Retention Time (sec)	Total Ion Current	Peptide start index	Peptide stop index	Exclusive	Other Proteins
Pascal Chartrand She2-GST 270214	She2-GST	She2-GST	Service Chartrand (F189209)	[].	She2-GST	Misc_12_Dec_2013_15_07_00.fasta	55286.8	1	186	323	4455	0.176	0.864	possibly correct	true	query=24475	CVEtFDLLNYYLTQSLQK	K	E	0.997	60.5	38.5	17.4	2		t4: Phospho (+79,97)	753.348	2257.02	2258.05	3	-0.01673	-7.409	4063.12	6280730	338	355	true
Pascal Chartrand She2-GST 270214	She2-GST	She2-GST	Service Chartrand (F189209)	[].	She2-GST	Misc_12_Dec_2013_15_07_00.fasta	55286.8	1	186	323	4455	0.176	0.864	possibly correct	true	query=24547	CVEtFDLLNYYLTQSLQK	K	E	0.997	70.8	38.5	34.4	2		t4: Phospho (+79,97)	1129.52	2257.03	2258.05	2	-0.01095	-4.851	4071.16	1.78436E7	338	355	true
Pascal Chartrand She2-GST 270214	She2-GST	She2-GST	Service Chartrand (F189209)	[].	She2-GST	Misc_12_Dec_2013_15_07_00.fasta	55286.8	1	186	323	4455	0.176	0.864	possibly correct	true	query=24451	CVEtFDLLNYYLTQSLQK	K	E	0.997	92.6	38.5	48.3	2		t4: Phospho (+79,97)	1129.53	2257.04	2258.05	2	0.004847	2.146	4060.12	1.87454E7	338	355	true
Pascal Chartrand She2-GST 270214	She2-GST	She2-GST	Service Chartrand (F189209)	[].	She2-GST	Misc_12_Dec_2013_15_07_00.fasta	55286.8	1	186	323	4455	0.176	0.864	possibly correct	true	query=19559	EFQTLSAAWHsILDGkLSALDEEFDVVATK	E	W	0.947	41.5	44	0	2		s11: Phospho (+79,97), k16: Acetyl (+42,01)	1148.22	3441.64	3442.65	3	0.0006039	0.1754	3516.89	1.92872E7	439	468	true
Pascal Chartrand She2-GST 270214	She2-GST	She2-GST	Service Chartrand (F189209)	[].	She2-GST	Misc_12_Dec_2013_15_07_00.fasta	55286.8	1	186	323	4455	0.176	0.864	possibly correct	true	query=17112	IDDtyNHFVKFSQWmIESLR	A	I	0.716	30	40.7	12.5	2		t4: Phospho (+79,97), y5: Phospho (+79,97), m15: Oxidation (+15,99)	902.389	2704.15	2705.15	3	0.002224	0.8222	3248.36	8821190	376	395	true
Pascal Chartrand She2-GST 270214	She2-GST	She2-GST	Service Chartrand (F189209)	[].	She2-GST	Misc_12_Dec_2013_15_07_00.fasta	55286.8	1	186	323	4455	0.176	0.864	possibly correct	true	query=18804	ILDGkLsALDEEFDVVATK	S	W	0.99	47.1	36.8	39.8	2		k5: Acetyl (+42,01), s7: Phospho (+79,97)	1093.05	2184.08	2185.07	2	0.02178	9.967	3437.14	2605060	450	468	true
Pascal Chartrand She2-GST 270214	She2-GST	She2-GST	Service Chartrand (F189209)	[].	She2-GST	Misc_12_Dec_2013_15_07_00.fasta	55286.8	1	186	323	4455	0.176	0.864	possibly correct	true	query=24858	KCVEtFDLLnYYLTQSLQK	V	E	0.756	29.2	39.2	9.73	2		t5: Phospho (+79,97), n10: Deamidation (+0,98)	796.37	2386.09	2387.12	3	-0.03014	-12.62	4110.7	8.31405E7	337	355	true
Pascal Chartrand She2-GST 270214	She2-GST	She2-GST	Service Chartrand (F189209)	[].	She2-GST	Misc_12_Dec_2013_15_07_00.fasta	55286.8	1	186	323	4455	0.176	0.864	possibly correct	true	query=25263	KCVEtFDLLnYYLTQSLQK	V	E	0.914	34.2	39.2	8.55	2		t5: Phospho (+79,97), n10: Deamidation (+0,98)	796.368	2386.08	2387.12	3	-0.03437	-14.4	4165.73	5554110	337	355	true
Pascal Chartrand She2-GST 270214	She2-GST	She2-GST	Service Chartrand (F189209)	[].	She2-GST	Misc_12_Dec_2013_15_07_00.fasta	55286.8	1	186	323	4455	0.176	0.864	possibly correct	true	query=24515	KCVEtFDLLnYYLTQSLQK	V	E	0.919	34.5	39.2	12.4	2		t5: Phospho (+79,97), n10: Deamidation (+0,98)	796.37	2386.09	2387.12	3	-0.02765	-11.58	4067.74	2.0919E8	337	355	true
Pascal Chartrand She2-GST 270214	She2-GST	She2-GST	Service Chartrand (F189209)	[].	She2-GST	Misc_12_Dec_2013_15_07_00.fasta	55286.8	1	186	323	4455	0.176	0.864	possibly correct	true	query=25182	KCVEtFDLLnYYLTQSLQK	V	E	0.944	36.3	39.1	12.7	2		t5: Phospho (+79,97), n10: Deamidation (+0,98)	796.369	2386.09	2387.12	3	-0.03155	-13.21	4154.93	4752750	337	355	true
Pascal Chartrand She2-GST 270214	She2-GST	She2-GST	Service Chartrand (F189209)	[].	She2-GST	Misc_12_Dec_2013_15_07_00.fasta	55286.8	1	186	323	4455	0.176	0.864	possibly correct	true	query=25333	KCVEtFDLLnYYLTQSLQK	V	E	0.988	48.3	39.2	40.5	2		t5: Phospho (+79,97), n10: Deamidation (+0,98)	1194.05	2386.09	2387.12	2	-0.03057	-12.81	4194.19	1011430	337	355	true
Pascal Chartrand She2-GST 270214	She2-GST	She2-GST	Service Chartrand (F189209)	[].	She2-GST	Misc_12_Dec_2013_15_07_00.fasta	55286.8	1	186	323	4455	0.176	0.864	possibly correct	true	query=24696	KCVEtFDLLnYYLTQSLQK	V	E	0.989	44.6	39.1	15.9	2		t5: Phospho (+79,97), n10: Deamidation (+0,98)	796.369	2386.09	2387.12	3	-0.03125	-13.09	4089.16	7.63948E7	337	355	true
Pascal Chartrand She2-GST 270214	She2-GST	She2-GST	Service Chartrand (F189209)	[].	She2-GST	Misc_12_Dec_2013_15_07_00.fasta	55286.8	1	186	323	4455	0.176	0.864	possibly correct	true	query=24328	KCVEtFDLLnYYLTQSLQK	V	E	0.99	45.3	39.1	20.8	2		t5: Phospho (+79,97), n10: Deamidation (+0,98)	796.37	2386.09	2387.12	3	-0.02906	-12.17	4046.18	3.70056E7	337	355	true
Pascal Chartrand She2-GST 270214	She2-GST	She2-GST	Service Chartrand (F189209)	[].	She2-GST	Misc_12_Dec_2013_15_07_00.fasta	55286.8	1	186	323	4455	0.176	0.864	possibly correct	true	query=24772	KCVEtFDLLnYYLTQSLQK	V	E	0.992	46.1	39.2	17.4	2		t5: Phospho (+79,97), n10: Deamidation (+0,98)	796.369	2386.08	2387.12	3	-0.0329	-13.78	4099.4	9.95431E7	337	355	true
Pascal Chartrand She2-GST 270214	She2-GST	She2-GST	Service Chartrand (F189209)	[].	She2-GST	Misc_12_Dec_2013_15_07_00.fasta	55286.8	1	186	323	4455	0.176	0.864	possibly correct	true	query=24951	KCVEtFDLLnYYLTQSLQK	V	E	0.994	48.4	39.2	21.8	2		t5: Phospho (+79,97), n10: Deamidation (+0,98)	796.369	2386.08	2387.12	3	-0.03305	-13.84	4121.83	3.62272E7	337	355	true
Pascal Chartrand She2-GST 270214	She2-GST	She2-GST	Service Chartrand (F189209)	[].	She2-GST	Misc_12_Dec_2013_15_07_00.fasta	55286.8	1	186	323	4455	0.176	0.864	possibly correct	true	query=24417	KCVEtFDLLnYYLTQSLQK	V	E	0.996	49.8	39.1	24.6	2		t5: Phospho (+79,97), n10: Deamidation (+0,98)	796.37	2386.09	2387.12	3	-0.02945	-12.34	4056.55	1.93102E8	337	355	true
Pascal Chartrand She2-GST 270214	She2-GST	She2-GST	Service Chartrand (F189209)	[].	She2-GST	Misc_12_Dec_2013_15_07_00.fasta	55286.8	1	186	323	4455	0.176	0.864	possibly correct	true	query=25246	KCVEtFDLLnYYLTQSLQK	V	E	0.997	56.6	39.2	36.9	2		t5: Phospho (+79,97), n10: Deamidation (+0,98)	1194.05	2386.09	2387.12	2	-0.02577	-10.8	4163.73	2579610	337	355	true
Pascal Chartrand She2-GST 270214	She2-GST	She2-GST	Service Chartrand (F189209)	[].	She2-GST	Misc_12_Dec_2013_15_07_00.fasta	55286.8	1	186	323	4455	0.176	0.864	possibly correct	true	query=25326	KCVEtFDLLnYYLTQSLQK	V	E	0.997	53.6	39.1	26.4	2		t5: Phospho (+79,97), n10: Deamidation (+0,98)	796.369	2386.09	2387.12	3	-0.03107	-13.01	4187.27	1396090	337	355	true
Pascal Chartrand She2-GST 270214	She2-GST	She2-GST	Service Chartrand (F189209)	[].	She2-GST	Misc_12_Dec_2013_15_07_00.fasta	55286.8	1	186	323	4455	0.176	0.864	possibly correct	true	query=25171	KCVEtFDLLnYYLTQSLQK	V	E	0.997	59.7	39.2	38.8	2		t5: Phospho (+79,97), n10: Deamidation (+0,98)	1194.05	2386.09	2387.12	2	-0.02617	-10.96	4152.86	6567550	337	355	true
Pascal Chartrand She2-GST 270214	She2-GST	She2-GST	Service Chartrand (F189209)	[].	She2-GST	Misc_12_Dec_2013_15_07_00.fasta	55286.8	1	186	323	4455	0.176	0.864	possibly correct	true	query=25029	KCVEtFDLLnYYLTQSLQK	V	E	0.997	60.8	39.2	44.3	2		t5: Phospho (+79,97), n10: Deamidation (+0,98)	1194.05	2386.08	2387.12	2	-0.03417	-14.31	4131.29	2.2637E7	337	355	true
Pascal Chartrand She2-GST 270214	She2-GST	She2-GST	Service Chartrand (F189209)	[].	She2-GST	Misc_12_Dec_2013_15_07_00.fasta	55286.8	1	186	323	4455	0.176	0.864	possibly correct	true	query=24612	KCVEtFDLLnYYLTQSLQK	V	E	0.997	56.1	39.2	31.7	2		t5: Phospho (+79,97), n10: Deamidation (+0,98)	796.37	2386.09	2387.12	3	-0.02855	-11.96	4078.76	1.71862E8	337	355	true
Pascal Chartrand She2-GST 270214	She2-GST	She2-GST	Service Chartrand (F189209)	[].	She2-GST	Misc_12_Dec_2013_15_07_00.fasta	55286.8	1	186	323	4455	0.176	0.864	possibly correct	true	query=25109	KCVEtFDLLnYYLTQSLQK	V	E	0.997	69.2	39.1	42.3	2		t5: Phospho (+79,97), n10: Deamidation (+0,98)	1194.05	2386.09	2387.12	2	-0.02937	-12.3	4141.82	1.08561E7	337	355	true
Pascal Chartrand She2-GST 270214	She2-GST	She2-GST	Service Chartrand (F189209)	[].	She2-GST	Misc_12_Dec_2013_15_07_00.fasta	55286.8	1	186	323	4455	0.176	0.864	possibly correct	true	query=24764	KCVEtFDLLnYYLTQSLQK	V	E	0.997	73.6	39.2	41.8	2		t5: Phospho (+79,97), n10: Deamidation (+0,98)	1194.05	2386.09	2387.12	2	-0.02657	-11.13	4098.25	2.39807E8	337	355	true
Pascal Chartrand She2-GST 270214	She2-GST	She2-GST	Service Chartrand (F189209)	[].	She2-GST	Misc_12_Dec_2013_15_07_00.fasta	55286.8	1	186	323	4455	0.176	0.864	possibly correct	true	query=24415	KCVEtFDLLnYYLTQSLQK	V	E	0.997	74.1	39.2	50.5	2		t5: Phospho (+79,97), n10: Deamidation (+0,98)	1194.05	2386.09	2387.12	2	-0.02657	-11.13	4056.13	3.99839E8	337	355	true
Pascal Chartrand She2-GST 270214	She2-GST	She2-GST	Service Chartrand (F189209)	[].	She2-GST	Misc_12_Dec_2013_15_07_00.fasta	55286.8	1	186	323	4455	0.176	0.864	possibly correct	true	query=24937	KCVEtFDLLnYYLTQSLQK	V	E	0.997	74.4	39.2	49.5	2		t5: Phospho (+79,97), n10: Deamidation (+0,98)	1194.05	2386.09	2387.12	2	-0.02797	-11.72	4120.45	1.12549E8	337	355	true
Pascal Chartrand She2-GST 270214	She2-GST	She2-GST	Service Chartrand (F189209)	[].	She2-GST	Misc_12_Dec_2013_15_07_00.fasta	55286.8	1	186	323	4455	0.176	0.864	possibly correct	true	query=24504	KCVEtFDLLnYYLTQSLQK	V	E	0.997	75.1	39.2	51.8	2		t5: Phospho (+79,97), n10: Deamidation (+0,98)	1194.05	2386.09	2387.12	2	-0.02657	-11.13	4066.55	3.94803E8	337	355	true
Pascal Chartrand She2-GST 270214	She2-GST	She2-GST	Service Chartrand (F189209)	[].	She2-GST	Misc_12_Dec_2013_15_07_00.fasta	55286.8	1	186	323	4455	0.176	0.864	possibly correct	true	query=24844	KCVEtFDLLnYYLTQSLQK	V	E	0.997	75.2	39.2	48.8	2		t5: Phospho (+79,97), n10: Deamidation (+0,98)	1194.05	2386.09	2387.12	2	-0.02497	-10.46	4109.03	1.95144E8	337	355	true
Pascal Chartrand She2-GST 270214	She2-GST	She2-GST	Service Chartrand (F189209)	[].	She2-GST	Misc_12_Dec_2013_15_07_00.fasta	55286.8	1	186	323	4455	0.176	0.864	possibly correct	true	query=24686	KCVEtFDLLnYYLTQSLQK	V	E	0.997	76.2	39.2	51.5	2		t5: Phospho (+79,97), n10: Deamidation (+0,98)	1194.05	2386.09	2387.12	2	-0.02677	-11.21	4087.85	2.41189E8	337	355	true
Pascal Chartrand She2-GST 270214	She2-GST	She2-GST	Service Chartrand (F189209)	[].	She2-GST	Misc_12_Dec_2013_15_07_00.fasta	55286.8	1	186	323	4455	0.176	0.864	possibly correct	true	query=24600	KCVEtFDLLnYYLTQSLQK	V	E	0.997	76.2	39.2	45.7	2		t5: Phospho (+79,97), n10: Deamidation (+0,98)	1194.05	2386.09	2387.12	2	-0.02517	-10.54	4077.28	3.51741E8	337	355	true
Pascal Chartrand She2-GST 270214	She2-GST	She2-GST	Service Chartrand (F189209)	[].	She2-GST	Misc_12_Dec_2013_15_07_00.fasta	55286.8	1	186	323	4455	0.176	0.864	possibly correct	true	query=23947	KKLRFynDCVLSYNASEFINEGK	V	N	0.909	36.2	41.4	8.2	2		y6: Phospho (+79,97), n7: Deamidation (+0,98)	940.443	2818.31	2819.31	3	0.002155	0.7642	4005.92	8112170	292	314	true
Pascal Chartrand She2-GST 270214	She2-GST	She2-GST	Service Chartrand (F189209)	[].	She2-GST	Misc_12_Dec_2013_15_07_00.fasta	55286.8	1	186	323	4455	0.176	0.864	possibly correct	true	query=24627	KVILPIAsmFVKCVETFDLLNYYLTQSLQK	D	E	0.997	85.4	42.8	25.7	2		s8: Phospho (+79,97), m9: Oxidation (+15,99)	1200.94	3599.8	3600.85	3	-0.04014	-11.15	4080.72	1.70268E7	326	355	true
Pascal Chartrand She2-GST 270214	She2-GST	She2-GST	Service Chartrand (F189209)	[].	She2-GST	Misc_12_Dec_2013_15_07_00.fasta	55286.8	1	186	323	4455	0.176	0.864	possibly correct	true	query=16727	LEVLFQGPMsKD	R	K	0.84	27.8	33	27.8	2		s10: Phospho (+79,97)	722.337	1442.66	1443.66	2	0.006647	4.604	3208.08	8901360	225	236	true
Pascal Chartrand She2-GST 270214	She2-GST	She2-GST	Service Chartrand (F189209)	[].	She2-GST	Misc_12_Dec_2013_15_07_00.fasta	55286.8	1	186	323	4455	0.176	0.864	possibly correct	true	query=16940	LEVLFQGPMsKD	R	K	0.93	32.4	33.1	30.9	2		s10: Phospho (+79,97)	722.336	1442.66	1443.66	2	0.005747	3.981	3230.33	6185940	225	236	true
Pascal Chartrand She2-GST 270214	She2-GST	She2-GST	Service Chartrand (F189209)	[].	She2-GST	Misc_12_Dec_2013_15_07_00.fasta	55286.8	1	186	323	4455	0.176	0.864	possibly correct	true	query=16826	LEVLFQGPMsKD	R	K	0.995	48.4	33.4	37.9	2		s10: Phospho (+79,97)	722.338	1442.66	1443.66	2	0.009087	6.294	3218.64	6.99033E7	225	236	true
Pascal Chartrand She2-GST 270214	She2-GST	She2-GST	Service Chartrand (F189209)	[].	She2-GST	Misc_12_Dec_2013_15_07_00.fasta	55286.8	1	186	323	4455	0.176	0.864	possibly correct	true	query=16278	LEVLFQGPMsKDKDIK	R	V	0.984	42.6	35.2	38	2		s10: Phospho (+79,97)	964.485	1926.96	1927.96	2	0.002167	1.124	3161.32	4455470	225	240	true
END OF FILE

## Sheet: Supp_Table S3
Experiment name	Biological sample category	Biological sample name	MS/MS sample name	Protein name	Protein accession numbers	Alternate IDsDatabase sources	Protein molecular weight (Da)	Protein identification probability	Exclusive unique peptide count	Exclusive unique spectrum count	Exclusive spectrum count	Percentage of total spectra	Percentage sequence coverage	Manual validation	Assigned	Spectrum name	Peptide sequence	Previous amino acid	Next amino acid	Peptide identification probability	Mascot Ion score	Mascot Identity score	Mascot Delta Ion Score	Number of enzymatic termini	Fixed modifications identified by spectrum	Variable modifications identified by spectrum	Observed m/z	Actual peptide mass (AMU)	Calculated +1H Peptide Mass (AMU)	Spectrum charge	Actual minus calculated peptide mass (AMU)	Actual minus calculated peptide mass (PPM)	Retention Time (sec)	Total Ion Current	Peptide start index	Peptide stop index	Exclusive	Other Proteins
Karen_20160316_UniProt_S_Cerevisiae_Band_1_2_3_SHE2_SCAFF3	02-Band 1	02-Band 1	2016 7:21:15 PM;File Size: 246612386 [Byte] (F006687)	SWI5-dependent HO expression protein 2 OS=Saccharomyces cerevisiae (strain RM11-1a) GN=SHE2 PE=3 SV=1	SHE2_YEAS1,SHE2_YEAS2,SHE2_YEAS6,SHE2_YEAS8,SHE2_YEAST		28252.7	1	26	44	316	0.0319	0.809	correct	true	SpectrumID: "7702"; File: "\\plateau01\Genome\LTQ_Orbitrap_Velos\Data\2016\VL_20160407_CHA_01.raw"	YLsSYIHVLNK	R	F	0.959	36	25	1.94	2		s3: Phospho (+79,97)	708.845	1415.68	1416.69	2	-0.008753	-6.179	2794	981.449	27	37	true
Karen_20160316_UniProt_S_Cerevisiae_Band_1_2_3_SHE2_SCAFF3	06-Band 3	06-Band 3	2016 1:35:36 AM;File Size: 481537332 [Byte] (F006683)	SWI5-dependent HO expression protein 2 OS=Saccharomyces cerevisiae (strain RM11-1a) GN=SHE2 PE=3 SV=1	SHE2_YEAS1,SHE2_YEAS2,SHE2_YEAS6,SHE2_YEAS8,SHE2_YEAST		28252.7	1	41	82	1927	0.0874	0.996	correct	true	SpectrumID: "18940"; File: "\\plateau01\Genome\LTQ_Orbitrap_Velos\Data\2016\VL_20160407_CHA_03.raw"	cVEtFDLLNYYLTQSLQK	K	E	0.995	31.6	25	12.1	2	c1: Carbamidomethyl (+57,02)	t4: Phospho (+79,97)	772.358	2314.05	2315.07	3	-0.008675	-3.747	5772	19938.8	106	123	true
Karen_20160316_UniProt_S_Cerevisiae_Band_1_2_3_SHE2_SCAFF3	06-Band 3	06-Band 3	2016 1:35:36 AM;File Size: 481537332 [Byte] (F006683)	SWI5-dependent HO expression protein 2 OS=Saccharomyces cerevisiae (strain RM11-1a) GN=SHE2 PE=3 SV=1	SHE2_YEAS1,SHE2_YEAS2,SHE2_YEAS6,SHE2_YEAS8,SHE2_YEAST		28252.7	1	41	82	1927	0.0874	0.996	possibly correct	true	SpectrumID: "14040"; File: "\\plateau01\Genome\LTQ_Orbitrap_Velos\Data\2016\VL_20160407_CHA_03.raw"	FsQWMIESLR	K	I	0.932	34.3	25	28.3	2		s2: Phospho (+79,97)	688.801	1375.59	1376.61	2	-0.01173	-8.524	4605	92554	154	163	true
Karen_20160316_UniProt_S_Cerevisiae_Band_1_2_3_SHE2_SCAFF3	06-Band 3	06-Band 3	2016 1:35:36 AM;File Size: 481537332 [Byte] (F006683)	SWI5-dependent HO expression protein 2 OS=Saccharomyces cerevisiae (strain RM11-1a) GN=SHE2 PE=3 SV=1	SHE2_YEAS1,SHE2_YEAS2,SHE2_YEAS6,SHE2_YEAS8,SHE2_YEAST		28252.7	1	41	82	1927	0.0874	0.996	possibly correct	true	SpectrumID: "13610"; File: "\\plateau01\Genome\LTQ_Orbitrap_Velos\Data\2016\VL_20160407_CHA_03.raw"	LSALDEEFDVVAtKWHDKFGK	K	L	0.995	32.6	25.2	23.6	2		t13: Phospho (+79,97)	629.55	2514.17	2515.19	4	-0.01241	-4.932	4512	267315	223	243	true
Karen_20160316_UniProt_S_Cerevisiae_Band_1_2_3_SHE2_SCAFF3	06-Band 3	06-Band 3	2016 1:35:36 AM;File Size: 481537332 [Byte] (F006683)	SWI5-dependent HO expression protein 2 OS=Saccharomyces cerevisiae (strain RM11-1a) GN=SHE2 PE=3 SV=1	SHE2_YEAS1,SHE2_YEAS2,SHE2_YEAS6,SHE2_YEAS8,SHE2_YEAST		28252.7	1	41	82	1927	0.0874	0.996	possibly correct	true	SpectrumID: "14670"; File: "\\plateau01\Genome\LTQ_Orbitrap_Velos\Data\2016\VL_20160407_CHA_03.raw"	LSALDEEFDVVAtKWHDKFGK	K	L	0.997	39.6	25.3	24.7	2		t13: Phospho (+79,97)	839.062	2514.16	2515.19	3	-0.01894	-7.53	4749	5502.5	223	243	true
Karen_20160316_UniProt_S_Cerevisiae_Band_1_2_3_SHE2_SCAFF3	06-Band 3	06-Band 3	2016 1:35:36 AM;File Size: 481537332 [Byte] (F006683)	SWI5-dependent HO expression protein 2 OS=Saccharomyces cerevisiae (strain RM11-1a) GN=SHE2 PE=3 SV=1	SHE2_YEAS1,SHE2_YEAS2,SHE2_YEAS6,SHE2_YEAS8,SHE2_YEAST		28252.7	1	41	82	1927	0.0874	0.996	possibly correct	true	SpectrumID: "13633"; File: "\\plateau01\Genome\LTQ_Orbitrap_Velos\Data\2016\VL_20160407_CHA_03.raw"	LSALDEEFDVVAtKWHDKFGK	K	L	0.997	46.6	25.4	46.6	2		t13: Phospho (+79,97)	839.062	2514.16	2515.19	3	-0.02002	-7.959	4517	96381.4	223	243	true
Karen_20160316_UniProt_S_Cerevisiae_Band_1_2_3_SHE2_SCAFF3	06-Band 3	06-Band 3	2016 1:35:36 AM;File Size: 481537332 [Byte] (F006683)	SWI5-dependent HO expression protein 2 OS=Saccharomyces cerevisiae (strain RM11-1a) GN=SHE2 PE=3 SV=1	SHE2_YEAS1,SHE2_YEAS2,SHE2_YEAS6,SHE2_YEAS8,SHE2_YEAST		28252.7	1	41	82	1927	0.0874	0.996	possibly correct	true	SpectrumID: "20207"; File: "\\plateau01\Genome\LTQ_Orbitrap_Velos\Data\2016\VL_20160407_CHA_03.raw"	NELDPEADsFDKVILPIASMFVK	K	C	0.987	26.6	25.2	4.5	2		s9: Phospho (+79,97)	886.762	2657.26	2658.28	3	-0.006429	-2.419	6082	130637	83	105	true
Karen_20160316_UniProt_S_Cerevisiae_Band_1_2_3_SHE2_SCAFF3	06-Band 3	06-Band 3	2016 1:35:36 AM;File Size: 481537332 [Byte] (F006683)	SWI5-dependent HO expression protein 2 OS=Saccharomyces cerevisiae (strain RM11-1a) GN=SHE2 PE=3 SV=1	SHE2_YEAS1,SHE2_YEAS2,SHE2_YEAS6,SHE2_YEAS8,SHE2_YEAST		28252.7	1	41	82	1927	0.0874	0.996	possibly correct	true	SpectrumID: "8580"; File: "\\plateau01\Genome\LTQ_Orbitrap_Velos\Data\2016\VL_20160407_CHA_03.raw"	RVAtLRFER	R	T	0.866	31.7	25	22.8	2		t4: Phospho (+79,97)	614.317	1226.62	1227.64	2	-0.009753	-7.945	3331	5705.58	44	52	true
END OF FILE
